# Supplementary material
Source: MDPI journal article supplement (https://www.mdpi.com/2073-4344/13/1/166)
Supplement: s1 [file s1]

# Protein-Carbonized Engineering to Construct Three-Dimensional Sponge-like Carbons for Oxygen Reduction Electrocatalysis

Xinyi Luo <sup>1</sup>, Yao Liu <sup>2</sup>, Wenli Liao <sup>2</sup>, Zhongbin Li <sup>2</sup>, Chaozhong Guo <sup>2</sup>, Wei Sun <sup>3</sup> and Zhongli Luo <sup>1,\*</sup>

<sup>1</sup> College of Basic Medical Science, Chongqing Medical University, Chongqing 400044, China

<sup>2</sup> Chongqing Key Laboratory of Materials Surface and Interface Science, College of Materials Science and Engineering, Chongqing University of Arts and Sciences, Chongqing 402160, China

<sup>3</sup> College of Chemistry and Environmental Engineering, Chongqing University of Arts and Sciences, Chongqing 402160, China

\* Correspondence: zhongliluo@163.com

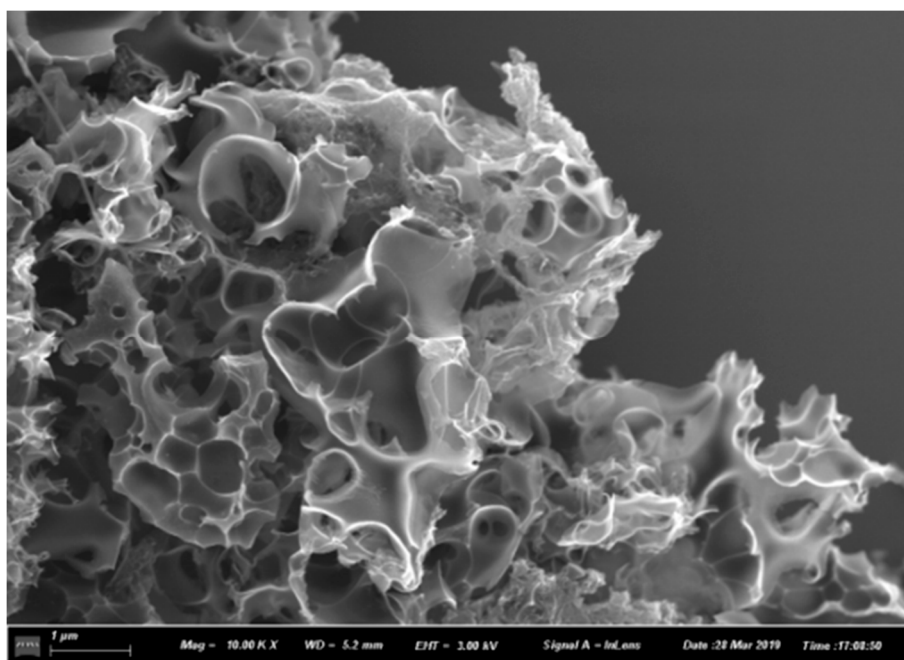

**Figure S1.** TEM images of Fe-PC@NaCl-900.

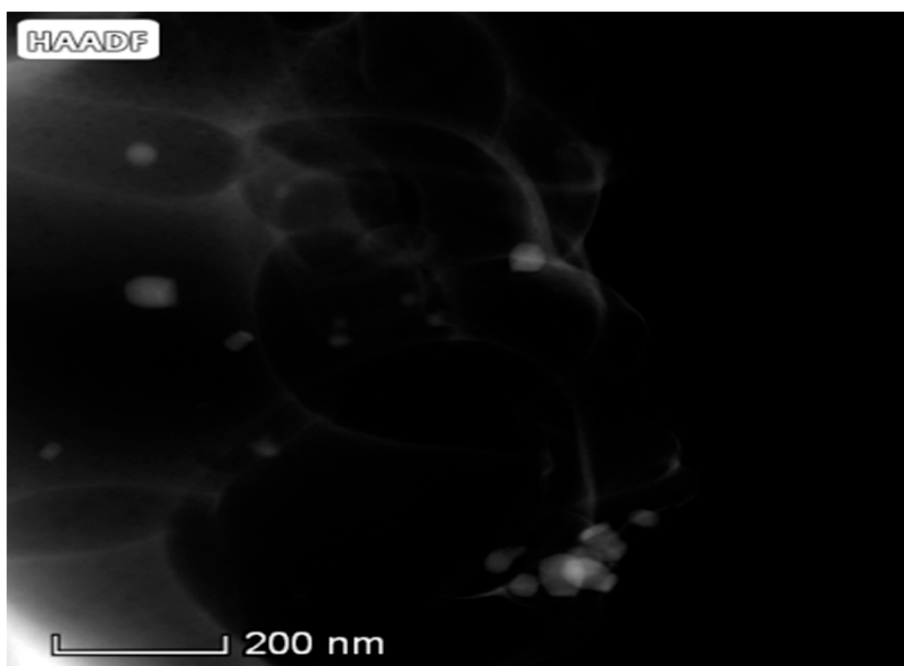

**Figure S2.** The elemental mapping of the Fe-PC@NaCl catalyst.

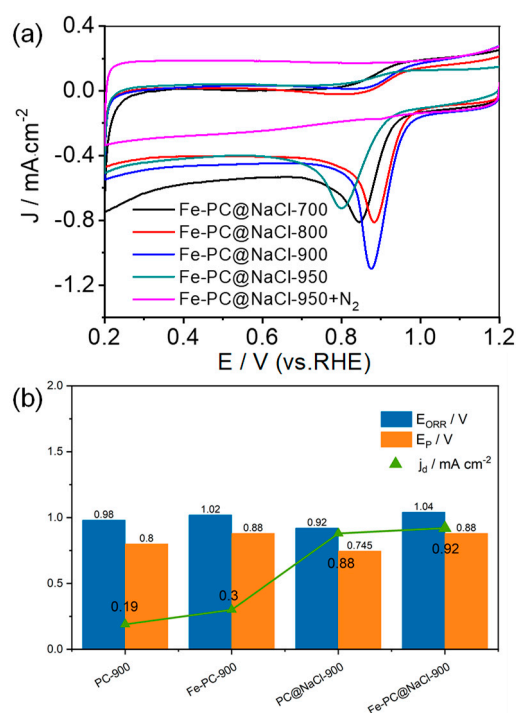

**Figure S3.** (a) CV curves of Fe-PC@NaCl-700, 800, 900, 950 in O<sub>2</sub> and Fe-PC@NaCl-950 in N<sub>2</sub>-saturated 0.1 M KOH solution, respectively. (b) The  $E_p$ ,  $E_{ORR}$  and  $J_d$  of the PC-900, Fe-PC-900, PC@NaCl-900 and Fe-PC@NaCl-900.

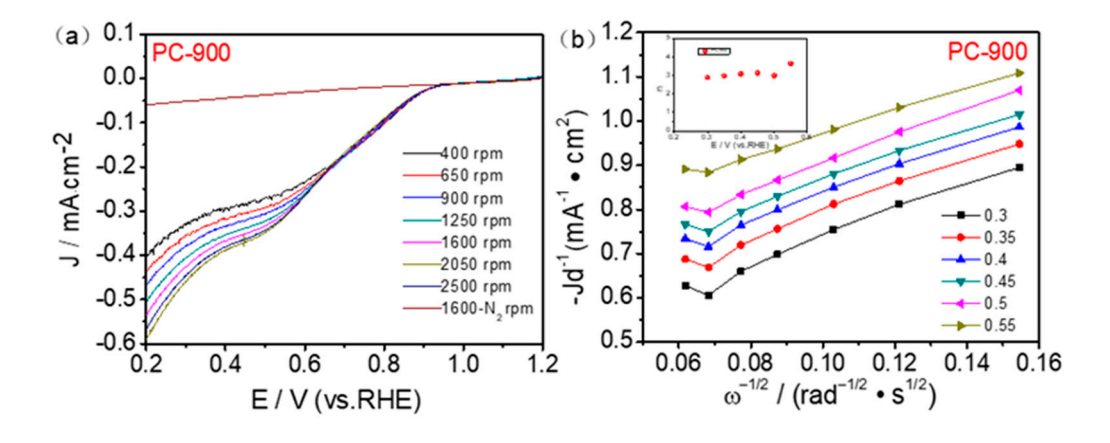

**Figure S4.** (a) LSV curves of PC-900 at various rotation rates. (b) K-L plots at various potentials.

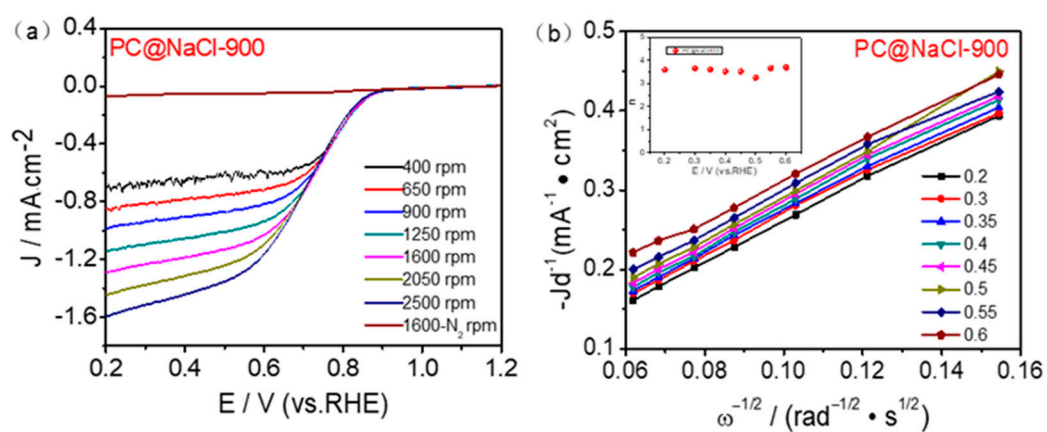

**Figure S5.** (a) LSV curves of PC@NaCl-900 at various rotation rates. (b) K-L plots at various potentials.

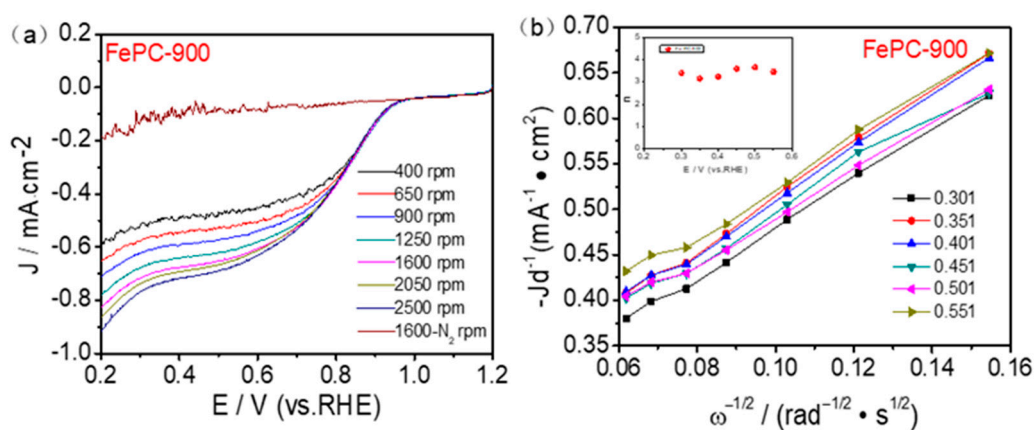

**Figure S6.** (a) LSV curves of FePC-900 at various rotation rates. (b) K–L plots at various potentials.

**Table S1.** N 1s XPS results from Figure 4e.

| Sample         | Total N content (%) | Pyridinic N (%) | Nitrile N (%) | Graphitic N (%) | Oxidized N (%) |
|----------------|---------------------|-----------------|---------------|-----------------|----------------|
| Pc-900         | 2.02                | 23.7%           | 17.8%         | 43.2%           | 15.3           |
| PC@NaCl-900    | 2.06                | 14.6%           | --            | 86.4%           | --             |
| FePc-900       | 1.67                | 20.03%          | --            | 79.97%          | --             |
| Fe-PC@NaCl-900 | 1.66                | 14.8%           | --            | 85.2%           | --             |
